# Supplementary material for: Hop (Humulus lupulus L.) Specialized Metabolites: Extraction, Purification, Characterization in Different Plant Parts and In Vitro Evaluation of Anti-Oomycete Activities against Phytophthora infestans
Source: MDPI journal article supplement (doi:10.3390/agronomy12112826), 2022-11-12
Supplement: s1 [file s1]

Archive with 1 entries (1 files):
- agronomy-1987823-supplementary.pdf
