# Supplementary material for: Hop (Humulus lupulus L.) Specialized Metabolites: Extraction, Purification, Characterization in Different Plant Parts and In Vitro Evaluation of Anti-Oomycete Activities against Phytophthora infestans
Source: MDPI journal article supplement (doi:10.3390/agronomy12112826), 2022-11-12
Supplement: s1 [file s1 › agronomy-1987823-supplementary.pdf]

## Supplementary materials

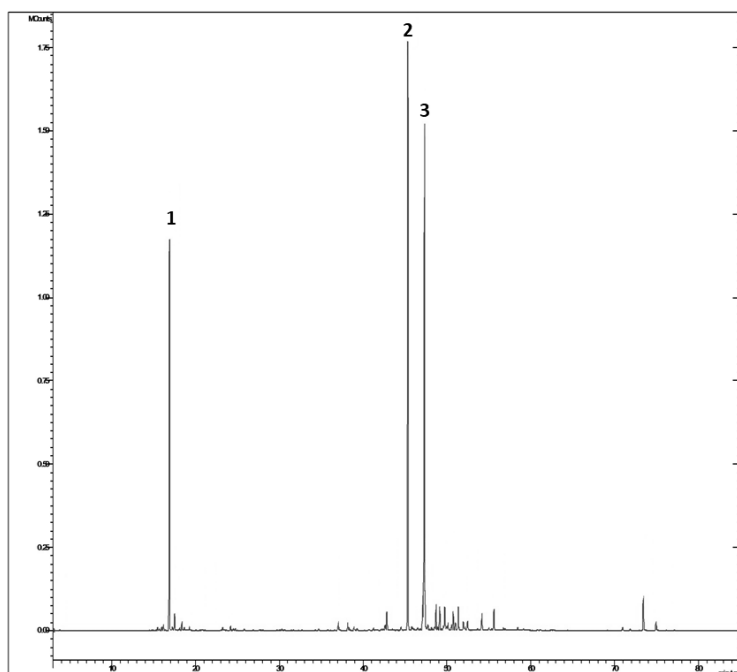

**Figure S1.** GC-MS chromatogram of the commercial essential oil of hop cones. Main compounds were identified as  $\beta$ -myrcene (1), *trans*-caryophyllene (2), and  $\alpha$ -humulene (3).

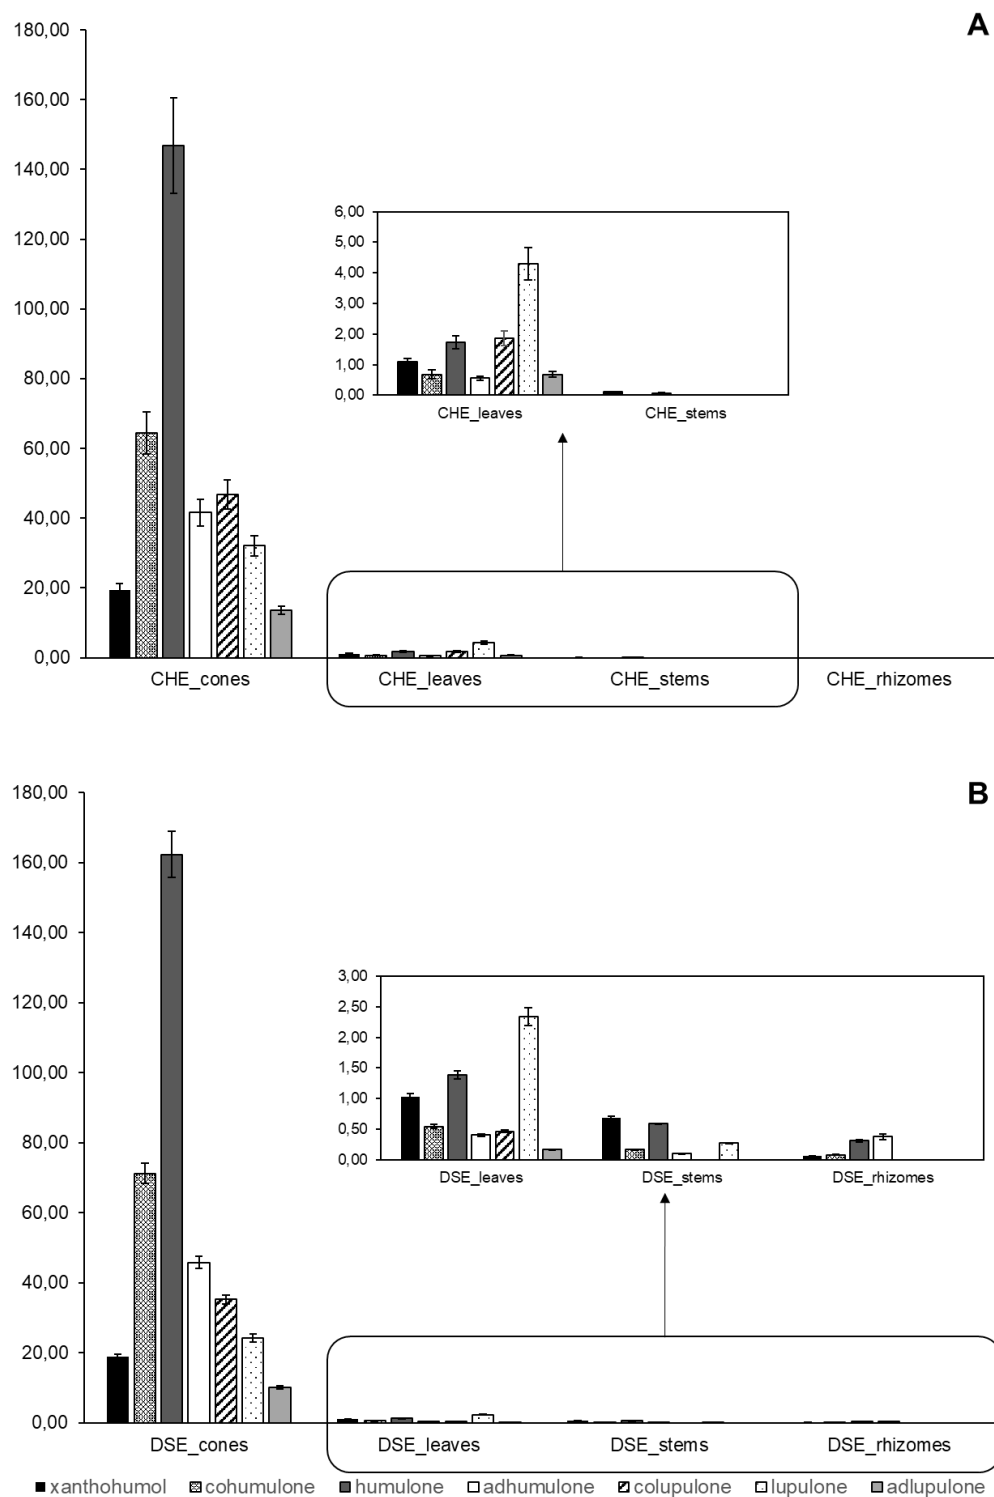

**Figure S2.** Content (in  $\mu\text{g.mg}^{-1}$ ) of prenylated chalcones and acylphloroglucinols in (A) Crude hydro-ethanolic extracts (CHE) and (B) DCM sub-extracts (DSE) of different hop parts ( $n = 3$ , mean  $\pm$  SD)
